# Supplementary material
Source: Springer Nature journal article supplement (https://www.springermedizin.de/resource/supplementary/12889_2012_5766_MOESM3_ESM.pdf/9496174)
Supplement: MOESM3 [file 9496174]

Table 3: Description of studies on the association between physical activity and type 2 diabetes mellitus.

| Author Year              | Study                       | Baseline – measuring points                        | Follow up time | Baseline sample; Age at Baseline                | Drop out     | Sample in Survey                            | Variables – PA; Outcome                                                                                                                                                                                                 | Results                                                                                                                                                                                                                                                                                                                                                                                                                                        | Limitations                                                                                                                                                                                                                                                                                  |
|--------------------------|-----------------------------|----------------------------------------------------|----------------|-------------------------------------------------|--------------|---------------------------------------------|-------------------------------------------------------------------------------------------------------------------------------------------------------------------------------------------------------------------------|------------------------------------------------------------------------------------------------------------------------------------------------------------------------------------------------------------------------------------------------------------------------------------------------------------------------------------------------------------------------------------------------------------------------------------------------|----------------------------------------------------------------------------------------------------------------------------------------------------------------------------------------------------------------------------------------------------------------------------------------------|
| Hu et al 1999 [26]       | Nurses' Health Study        | Baseline: 1979 - 1986                              | 7 years        | 121 700 female registered nurses; 30 – 55 years | 51 597 women | 70 103                                      | <p><i>PA:</i><br/>Average number of hours spend each week with certain activities;<br/>Asking about their usual walking speed – weekly energy index was calculated</p> <p><i>Outcome:</i><br/>Diagnosis of diabetes</p> | <p>The physical activity score is inversely associated with the risk of type 2 diabetes mellitus</p> <p>- Relative Risk [with 95% Confidence Interval] for t2dm in addition to energy expenditure</p> <p>1<sup>st</sup> Quintile = 1.00 (Ref.)<br/>2<sup>nd</sup> Quintile = 0.77 [0.66–0.90]<br/>3<sup>rd</sup> Quintile = 0.75 [0.65–0.88]<br/>4<sup>th</sup> Quintile = 0.80 [0.69–0.93]<br/>5<sup>th</sup> Quintile = 0.54 [0.45–0.64]</p> | <ul style="list-style-type: none"> <li>- Results just for women</li> <li>- Self-reported answers about diabetes</li> <li>- Just leisure time physical activity – no leisure time physical activity may also be important for diabetes prevention</li> </ul>                                  |
| Berenzen et al 2007 [27] | Copenhagen City Heart Study | Baseline: 1976/1978 - 1981/1983 - 1991 - 1998/2000 | 24 years       | 5 531 men; Median age 19 years                  | 4 878 men    | 653 men – (299 obese and 354 control group) | <p><i>PA:</i><br/>One question about physical activity habits: inactivity – moderate activity – high activity – very high activity</p> <p><i>Outcome:</i><br/>Diagnosis of diabetes – WHO standardized</p>              | <p>Leisure time physical activity reduces the risk of insulin resistance and impaired glucose tolerance</p> <p>- odds ratios [with 95% Confidence Interval] for impaired glucose tolerance in addition to intensity of activity</p> <p>Active = 1.00 (Ref.)<br/>Moderate Active = 1.72 [1.09–2.72]<br/>Inactive = 4.13 [ 1.96–8.86]</p>                                                                                                        | <ul style="list-style-type: none"> <li>- results just for men</li> <li>- high dropout rate</li> <li>- drop out people are less active and had lightly higher BMI</li> <li>- insulin sensitivity only measured at follow-up</li> <li>- BMI inaccurate measure for body composition</li> </ul> |

PA = physical activity, BMI = body mass index; WHO = World Health Organization; MET = metabolic equivalent of task

|                            |                                      |                                                                                         |               |                                          |                     |                                       |                                                                                                                                                   |                                                                                                                                                                                                                                                                                                                                                                                                                                                                             |                                                                                                                                                             |
|----------------------------|--------------------------------------|-----------------------------------------------------------------------------------------|---------------|------------------------------------------|---------------------|---------------------------------------|---------------------------------------------------------------------------------------------------------------------------------------------------|-----------------------------------------------------------------------------------------------------------------------------------------------------------------------------------------------------------------------------------------------------------------------------------------------------------------------------------------------------------------------------------------------------------------------------------------------------------------------------|-------------------------------------------------------------------------------------------------------------------------------------------------------------|
|                            |                                      |                                                                                         |               |                                          |                     |                                       | oral glucose tolerance test                                                                                                                       |                                                                                                                                                                                                                                                                                                                                                                                                                                                                             |                                                                                                                                                             |
| Katzmarzyk et al 2007 [29] | Physical Activity Longitudinal Study | Baseline: 1981 or 1988 - 2002/2004                                                      | 16 – 21 years | 4 900 men and women; 18 - 69 years       | 3 357 men and women | 1,543 persons - 709 men and 834 women | PA: Maximal Oxygen consumption - Canadian Aerobic Fitness Test<br>Outcome: Self-reported physician diagnosed diabetes                             | Physical activity, physical fitness and obesity are related to incidence of type 2 diabetes mellitus<br>- Odds Ratios [with 95% Confidence Interval] for t2dm in addition to obesity measurements<br><br>BMI = 2.02 [1.63-2.50]<br>Waist = 2.56 [1.93-3.43]<br>Circumference<br>Waist-Hip Ratio = 3.00 [2.03-4.46]<br>Skin fold thickness = 2.14 [1.61-2.85]<br>Physical activity = 0.77 [0.58-1.00]<br>Max. MET = 0.28 [0.14-0.57]<br>Physical fitness = 0.38 [ 0.23-0.62] | - self-reported physician-diagnosed diabetes<br>- high dropout rate                                                                                         |
| Mozaffarin et al 2009 [30] | Cardiovascular Health Study          | Baseline: 1989/ 1990 - 1992/1993 - annual to 1999 – semi-annual by telephone - end 2005 | 16 years      | 5 888 men and women; 65 years and older  | 1 005 men and women | 4,883 persons – 34,539 person-years   | PA: Usual walking habits (average pace and distance) - modified Minnesota Leisure-Time Activities questionnaire<br>Outcome: Incidence of diabetes | Lifestyle factors are associated with reduced risk of type 2 diabetes mellitus<br>- Hazard Ratios [with 95% Confidence Interval] for t2dm in addition to number of risk factors<br><br>2 factors = 0.54 [0.38-0.76]<br>3 factors – never smoke = 0.42 [0.25-0.71]<br>3 factors – no alcohol use = 0.32 [0.18-0.55]<br>4 factors = 0.18 [0.06-0.56]<br>5 factors = 0.11 [ 0.01-0.76]                                                                                         | limited time points for fasting and post challenge glucose levels - misclassification of diabetes cases<br>less lifestyle factors as mediator or moderators |
| Demakakos et al 2010 [28]  | English Longitudinal Study of Ageing | Baseline: 1998/2001 – 2004/2005 – 2006/2007                                             | 9 years       | 11 523 men and women; 50 years and older | 4 057 men and women | 7 466 men and women                   | PA: How often taking part in three different types of physical activity – vigorous,                                                               | Increasing physical activity intensity decreases the risk of type 2 diabetes mellitus<br>- Hazard Ratios [with 95% Confidence Interval] for t2dm in addition to intensity of activity<br><br>No physical activity = 1.00 (Ref.)<br>Low intensity = 0.68 [0.46-1.01]<br>Moderate / vigorous = 0.41 [0.28-0.59]                                                                                                                                                               | - Results just for people 50 years and older<br>- Use of self-reported physical activity<br>- Self-reported diabetes data                                   |

PA = physical activity, BMI = body mass index; WHO = World Health Organization; MET = metabolic equivalent of task

|  |  |  |  |  |  |  |  |                                                                                                                    |  |           |  |
|--|--|--|--|--|--|--|--|--------------------------------------------------------------------------------------------------------------------|--|-----------|--|
|  |  |  |  |  |  |  |  | moderate, low<br>intensity<br><i>Outcome:</i><br>Incidence of<br>self-reported<br>doctor-<br>diagnosed<br>diabetes |  | intensity |  |
|--|--|--|--|--|--|--|--|--------------------------------------------------------------------------------------------------------------------|--|-----------|--|

PA = physical activity, BMI = body mass index; WHO = World Health Organization; MET = metabolic equivalent of task
